# Supplementary material for: An efficient electrochemical synthesis of diamino-o-benzoquinone: Mechanistic and kinetic evaluation of the reaction of azide ion with o-benzoquinone
Source: Royal Society of Chemistry journal article supplement (doi:10.1039/b612224h), 2006-10-25
Supplement: b612224h.pdf [file b612224h.pdf]

## An Efficient Electrochemical Synthesis of Diamino-*o*-benzoquinone: Mechanistic and Kinetic Evaluation of the Reaction of Azide Ion with *o*-Benzoquinone

Davood Nematollahi,<sup>\*a</sup> Abbas Afkhami<sup>a</sup>, Esmail Tammari<sup>b</sup>, Tahere Shariatmanesh<sup>a</sup>, Mahdi Hesari<sup>a,c</sup>, and Maryam Shojaeifard<sup>d</sup>

<sup>a</sup> Faculty of Chemistry, University of Bu-Ali-Sina, Hamadan, 65174, Iran. Fax: +98-811-8272404 E-mail: [nemat@basu.ac.ir](mailto:nemat@basu.ac.ir)

<sup>b</sup> Asadabad Center, Region 6, Payame Noor University, Iran.

<sup>c</sup> Department of Soil Science, Faculty of Agriculture, University of Bu-Ali-Sina, Hamadan, 65174, Iran.

<sup>d</sup> Department of Chemistry, Graduate School, Azad University, Arak, Iran

### supplementary Information

#### Table of Contents:

|                                                                                                                      |        |
|----------------------------------------------------------------------------------------------------------------------|--------|
| 1. <sup>1</sup> H NMR spectrum of synthesized diamino- <i>o</i> -benzoquinone (6) .....                              | Page 2 |
| 2. <sup>13</sup> C NMR spectrum of synthesized diamino- <i>o</i> -benzoquinone (6).....                              | Page 3 |
| 3. M.S spectrum of synthesized diamino- <i>o</i> -benzoquinone (6) .....                                             | Page 4 |
| 4. IR spectrum of synthesized diamino- <i>o</i> -benzoquinone (6).....                                               | Page 5 |
| 5. Cyclic voltammogram of electrooxidation of catechol in the presence of azide in various potential scan rates..... | Page 6 |
| 6. Cyclic voltammogram of electrooxidation of catechol in the presence of azide in various pHs.....                  | Page 7 |

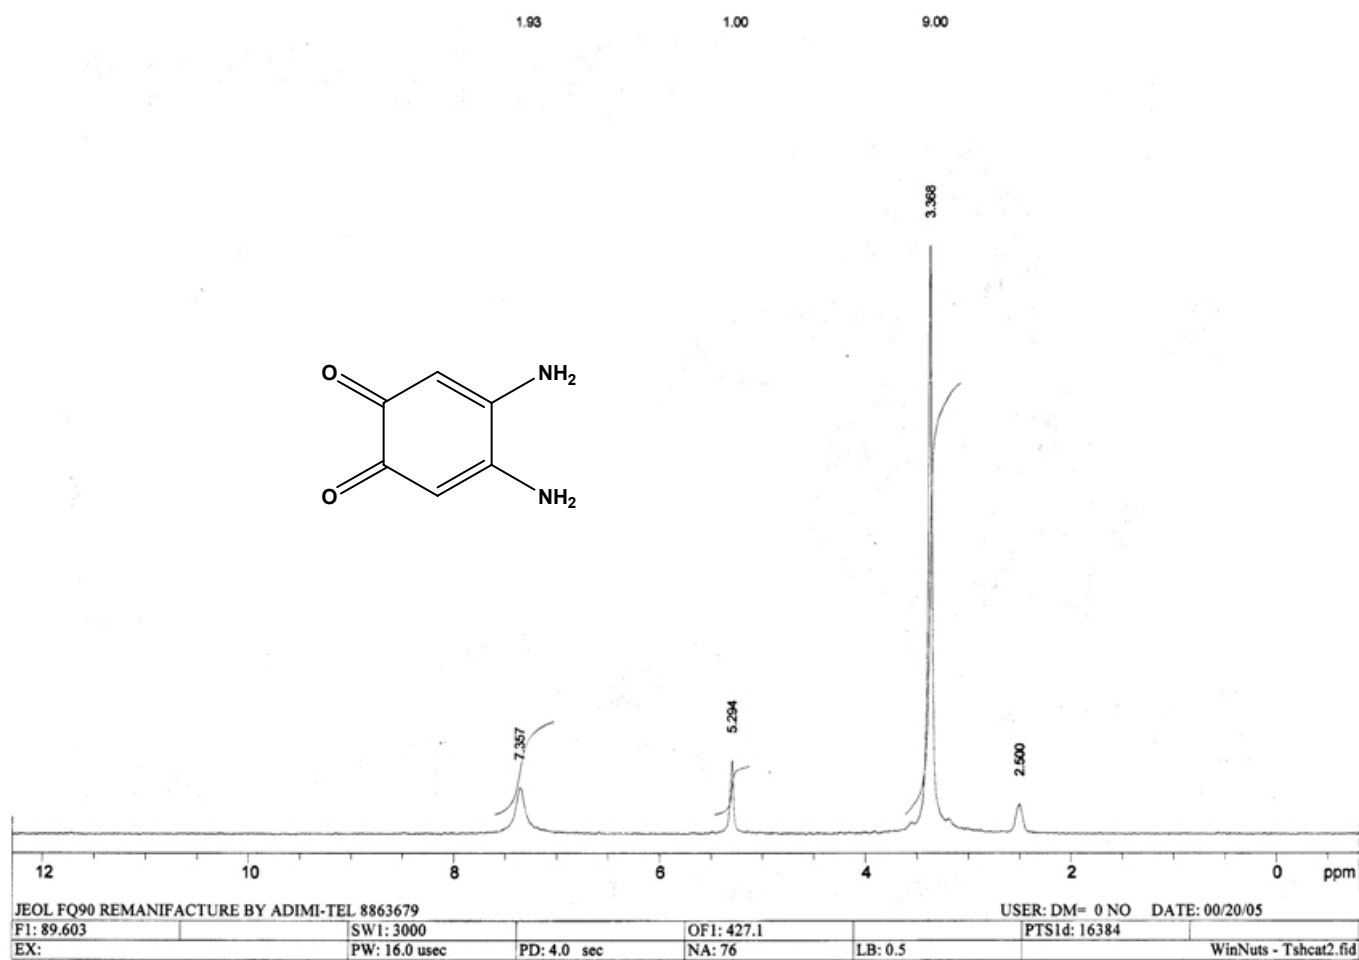

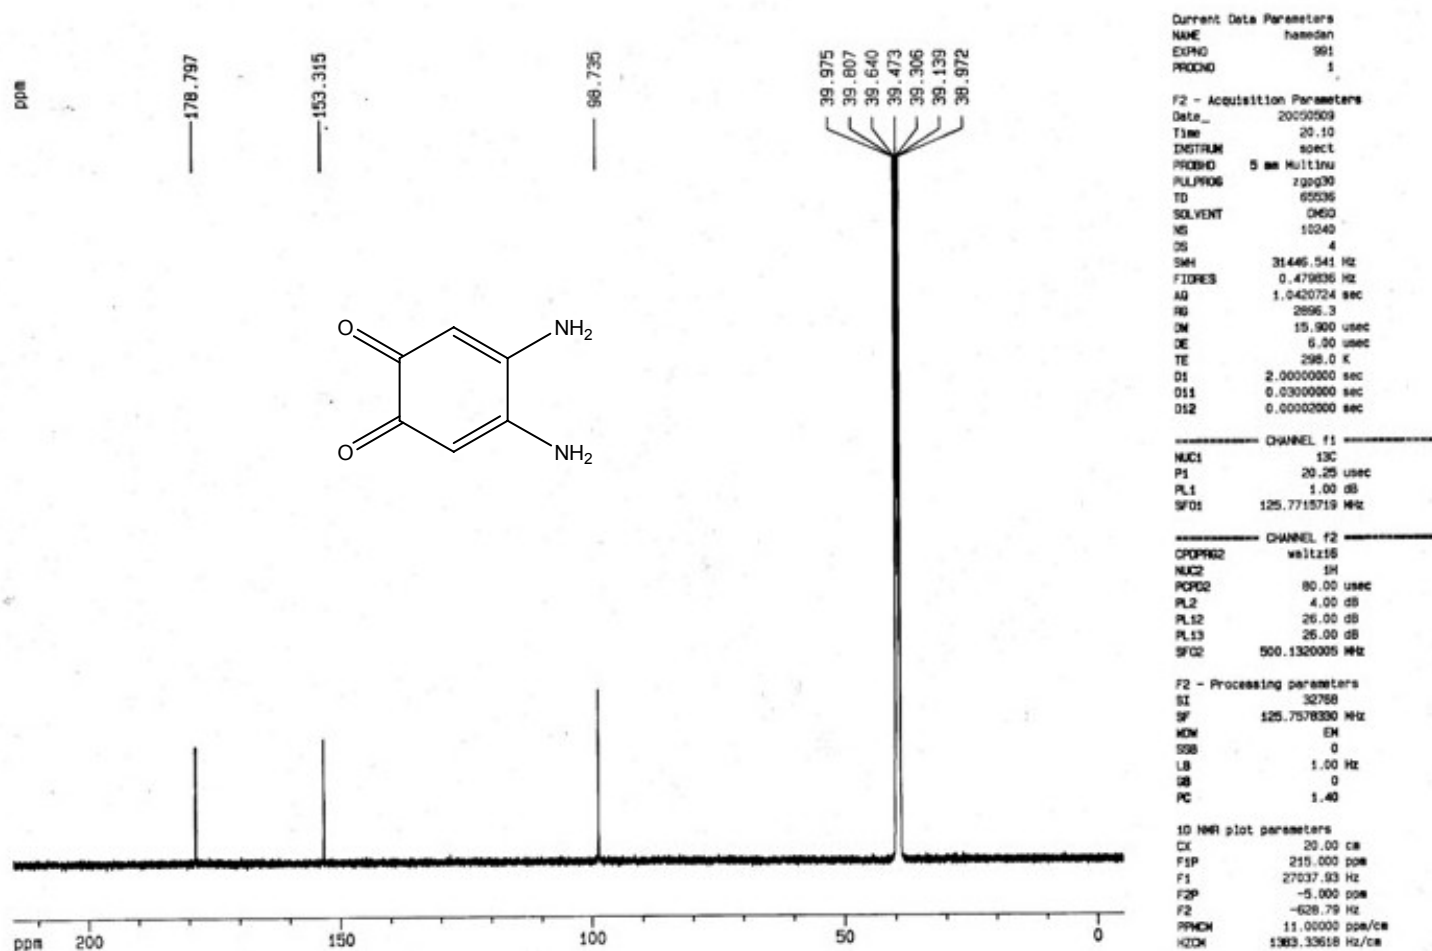

DI/SHAKIATMANESH M=149 OR 123/83.10.05

File : DI\_33.X35 Date 7/10/10 Time 12:12:28

S=36 Bp=41 Bi=198400. RT=1.27 CI=212

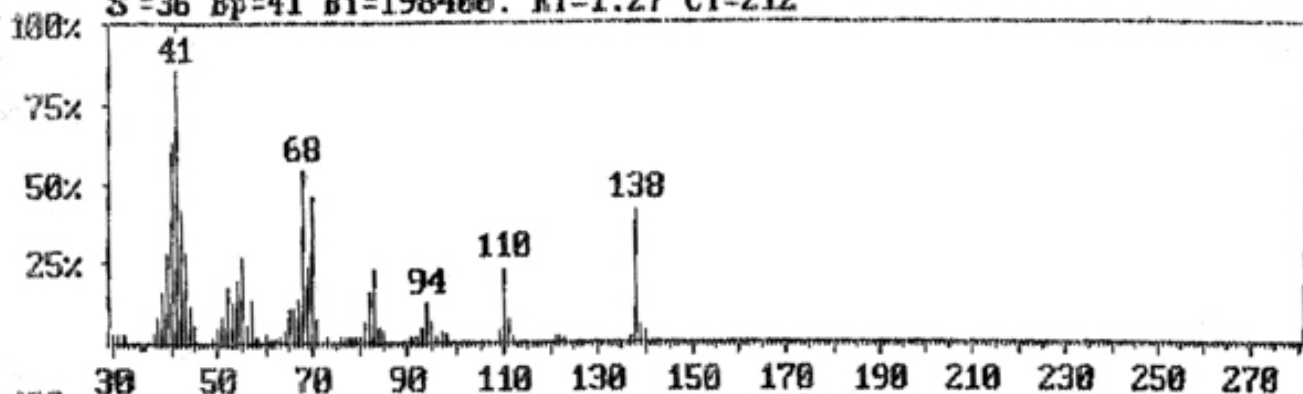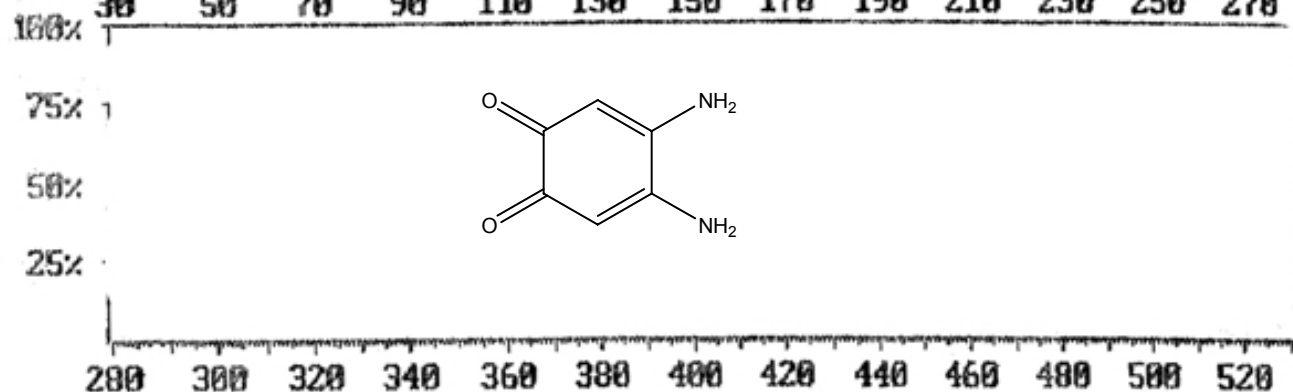

SB=30 SE=140 DB=30 DE=510 N=0 Z=2 T=0.0 Fact[ -> 1 \*1

S List > S=36 B=0 Pos=9 Tot=9

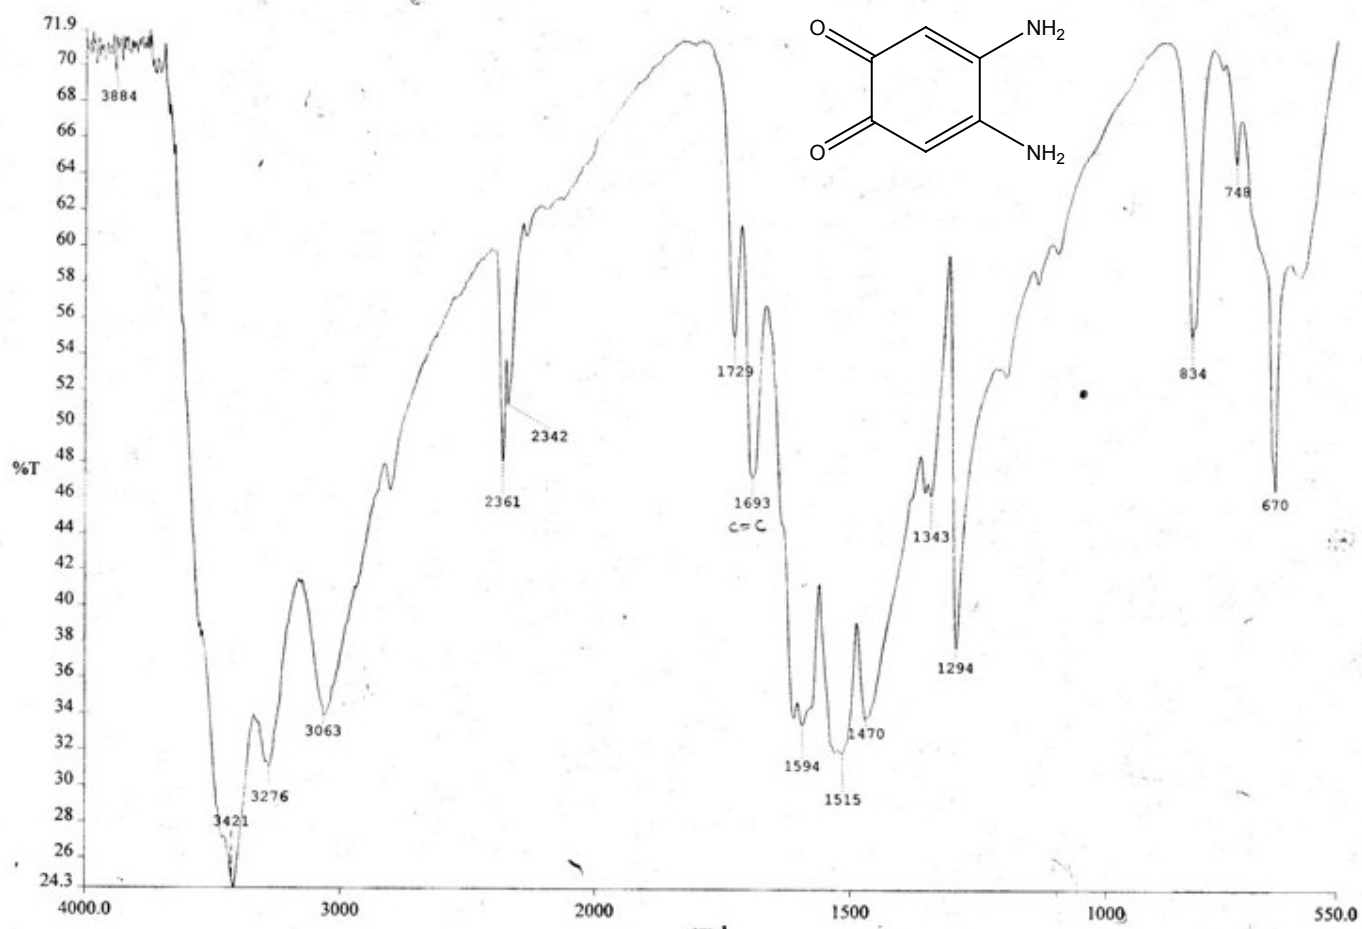

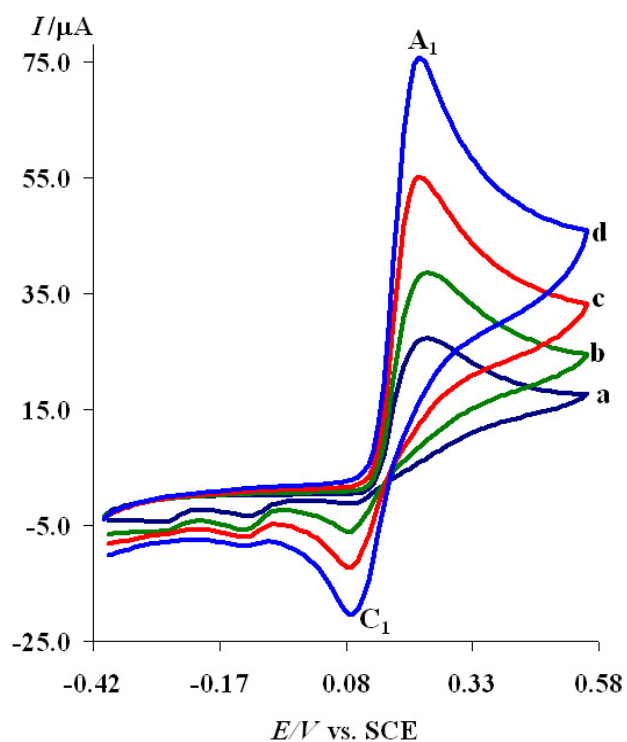

Typical voltammograms for 1.5 mM catechol in the presence of 5 mM azide ion at various scan rates. Scan rates from (a) to (d) are 10, 25, 50 and 100 mVs<sup>-1</sup>, respectively. ).  $t = 25 \pm 1$  °C.

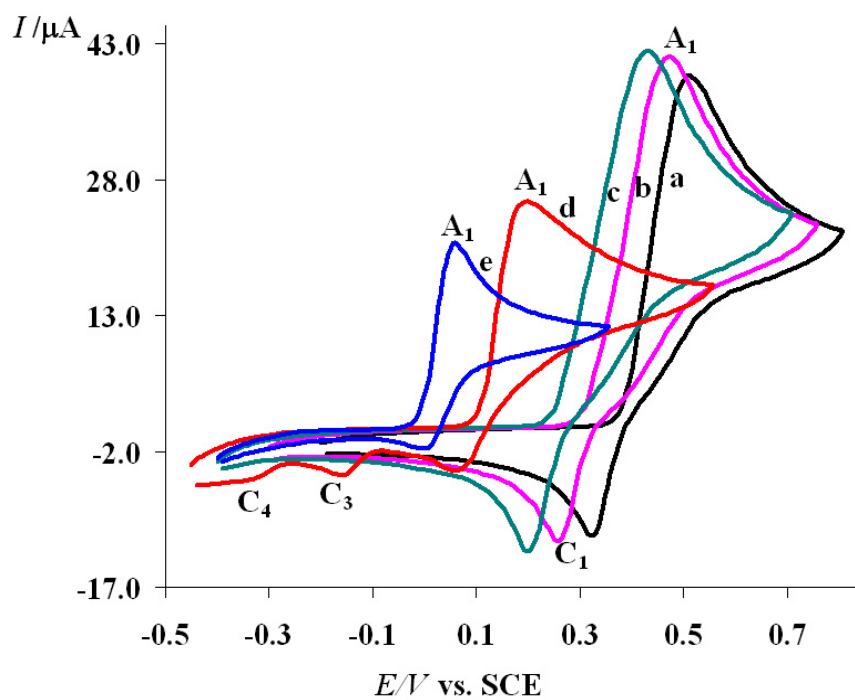

Cyclic voltammograms for 1 mM catechol in the presence of 5 mM azide ion in different pH, at glassy carbon electrode. pHs from a to e, are 2.0, 3.0, 4.0, 7.0 and 9.0 respectively. Scan rate 25 mV/s.  $t = 25 \pm 1$  °C.
